# Supplementary material for: Development and Validation of an Index Based on EAT-Lancet Recommendations: The Planetary Health Diet Index
Source: MDPI journal article supplement (doi:10.3390/nu13051698), 2021-05-17
Supplement: s1 [file s1]

**Table S1.** Example of foods and ingredients included in the PHDI components.

| Components                      | Example of included items                                                                                                                                                              |
|---------------------------------|----------------------------------------------------------------------------------------------------------------------------------------------------------------------------------------|
| Nuts and peanuts                | Nuts, pistachios, almonds, peanuts, and coconut pulp and milk                                                                                                                          |
| Legumes                         | Beans, pulses, lentils, chickpeas, peas, soybeans. Includes soy foods (e.g., soymilks, tofu, and textured soy protein)                                                                 |
| Fruits                          | All fruits, including fruits used in juices, nectars and punches. Includes coconut water.                                                                                              |
| Vegetables                      | All vegetables, except tubers.                                                                                                                                                         |
| Whole cereals                   | Brown rice, whole bread, and oat flakes                                                                                                                                                |
| Eggs                            | Chicken and other poultry eggs                                                                                                                                                         |
| Fish and seafood                | Fish and seafood, such as mussels and shrimp                                                                                                                                           |
| Tubers and potatoes             | All types of potatoes and cassava as well as their derivatives flours                                                                                                                  |
| Dairy                           | Cow, goat and buffalo milks, yogurts, and cheeses                                                                                                                                      |
| Vegetable oils                  | Vegetable oils used in recipes, such as soybean oil, sunflower oil and olive oil                                                                                                       |
| Dark green vegetables (DGV)     | Broccoli, arugula, cabbage, chicory, and watercress                                                                                                                                    |
| Red and orange vegetables (ReV) | Tomatoes, beetroots, carrots, and pumpkins                                                                                                                                             |
| Red meat                        | Beef, lamb and pork, including their processed meats (e.g., sausage, ham and salami)                                                                                                   |
| Chicken and substitutes         | Chicken and other poultry, including their processed meats (e.g.: pate). Includes intakes exceeding the upper limit of eggs and/or fish and seafood                                    |
| Animal fats                     | Lard, tallow, butter and other dairy fats (e.g., sour cream and cheese cream)                                                                                                          |
| Added sugars                    | All sweetener intake, including the table white or brown sugar and honey used as ingredients in processed or culinary products and the added sugar to manufactured foods and beverages |

**Figure S1.** Normal distribution of the Planetary Health Diet Index. ELSA-Brasil, 2008-2009.

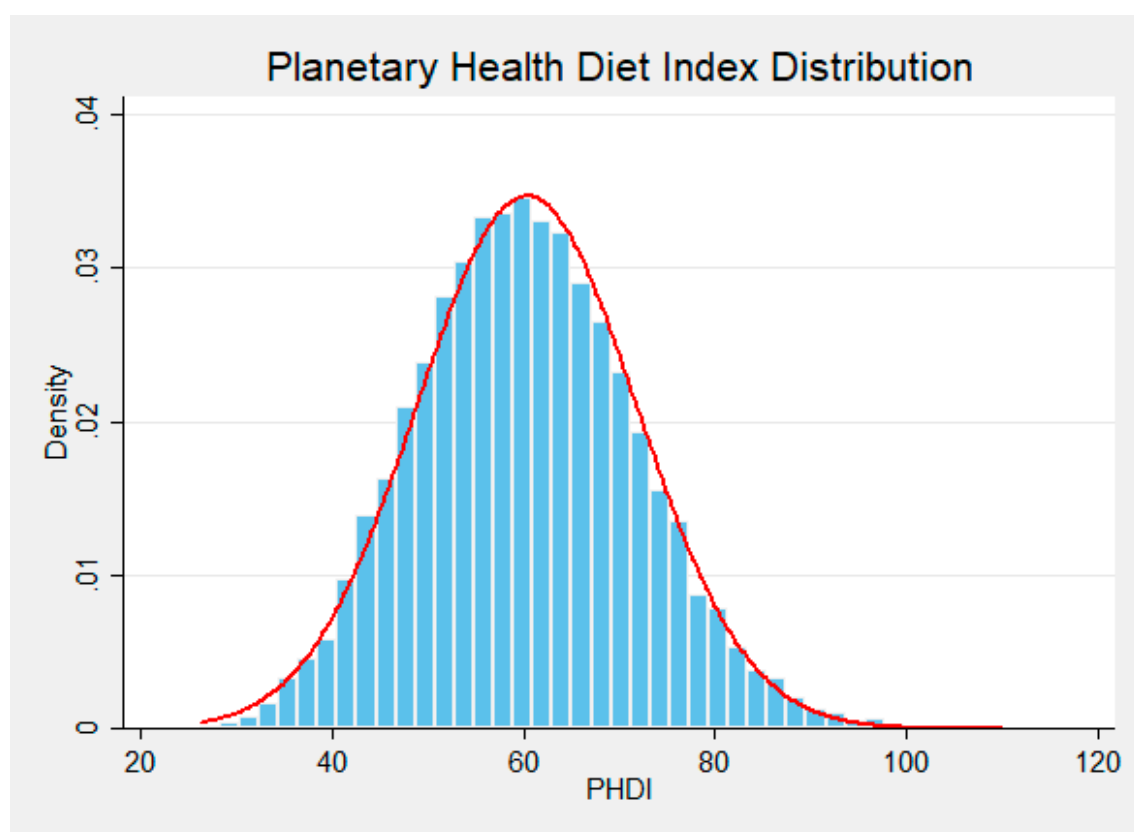

**Table S2.** Correlations between Planetary Health Diet Index components and each component with total energy intake. ELSA-Brasil, 2008-2009.

| Component               | Red meat | Nuts and peanuts | Legumes | Chicken and substitutes | Fish and seafood | Eggs    | Fruits  | Vegetables | DGV/total ratio | ReV/total ratio | Whole cereals | Tubers  | Dairy  | Unsaturated oils | Animal fats | Added sugars |
|-------------------------|----------|------------------|---------|-------------------------|------------------|---------|---------|------------|-----------------|-----------------|---------------|---------|--------|------------------|-------------|--------------|
| Nuts and peanuts        | 0.12**   |                  |         |                         |                  |         |         |            |                 |                 |               |         |        |                  |             |              |
| Legumes                 | -0.01    | -0.15**          |         |                         |                  |         |         |            |                 |                 |               |         |        |                  |             |              |
| Chicken and substitutes | 0.04**   | 0.08**           | 0.04**  |                         |                  |         |         |            |                 |                 |               |         |        |                  |             |              |
| Fish and seafood        | -0.09**  | 0.01             | 0.04**  | <b>0.25**</b>           |                  |         |         |            |                 |                 |               |         |        |                  |             |              |
| Eggs                    | -0.03**  | 0.03*            | 0.01    | <b>0.19**</b>           | 0.06**           |         |         |            |                 |                 |               |         |        |                  |             |              |
| Fruits                  | 0.03**   | 0.09**           | -0.12** | 0.01                    | 0.04**           | 0.01    |         |            |                 |                 |               |         |        |                  |             |              |
| Vegetables              | -0.01    | 0.03*            | 0.00**  | -0.02*                  | 0.05**           | -0.01   | 0.08**  |            |                 |                 |               |         |        |                  |             |              |
| DGV/total ratio         | 0.06**   | 0.12**           | -0.04** | 0.01                    | -0.03*           | 0.00    | 0.08**  | -0.03**    |                 |                 |               |         |        |                  |             |              |
| ReV/total ratio         | 0.05**   | 0.10**           | -0.07** | 0.03*                   | -0.03*           | 0.01    | 0.08**  | -0.17**    | 0.24**          |                 |               |         |        |                  |             |              |
| Whole cereals           | 0.18**   | <b>0.19**</b>    | -0.12** | 0.07**                  | -0.01            | 0.03**  | 0.08**  | -0.00      | 0.15**          | 0.16**          |               |         |        |                  |             |              |
| Tubers                  | 0.02*    | 0.04**           | -0.00   | 0.03**                  | -0.01            | 0.03**  | 0.00    | -0.13**    | <b>0.32**</b>   | <b>0.45**</b>   | 0.08**        |         |        |                  |             |              |
| Dairy                   | -0.03*   | -0.02*           | 0.18**  | -0.12**                 | -0.04**          | -0.03** | -0.02*  | 0.04**     | -0.06**         | -0.13**         | -0.06**       | -0.09** |        |                  |             |              |
| Unsaturated oils        | -0.10**  | -0.19**          | 0.04**  | -0.13**                 | -0.01            | -0.04** | -0.16** | 0.05**     | -0.21**         | -0.25**         | -0.20**       | -0.19** | 0.16** |                  |             |              |
| Animal fats             | 0.05**   | 0.03*            | 0.08**  | -0.03**                 | -0.07**          | 0.01    | -0.01   | -0.05**    | 0.10**          | 0.10**          | 0.09**        | 0.08**  | -0.01  | 0.02             |             |              |
| Added sugars            | 0.02*    | 0.06**           | 0.04**  | -0.06**                 | -0.08**          | -0.02   | 0.03*   | 0.01       | 0.13**          | 0.09**          | 0.07**        | 0.04**  | 0.01   | -0.09**          | 0.27**      |              |
| Energy                  | -0.10**  | -0.07**          | 0.23**  | 0.00                    | 0.11**           | 0.06**  | -0.03*  | 0.03*      | -0.20**         | -0.21**         | -0.18**       | -0.10** | 0.12** | 0.14**           | -0.09**     | -0.16**      |

\*p<0.05; \*\*p<0.001

**Table S3.** Mean and 95% CI of the Brazilian Health Eating Index Revised (BHEI-R) and carbon footprint, grouped by sex and age group. ELSA-Brasil, 2008-2009.

| Characteristics | Individuals |      | BHEI-R      |          | Carbon footprint <sup>a</sup> |             |          |
|-----------------|-------------|------|-------------|----------|-------------------------------|-------------|----------|
|                 | %           | mean | 95% CI      | p-value* | mean                          | 95% CI      | p-value* |
| Gender          |             |      |             | <0.001   |                               |             | 0.008    |
| Men             | 45.5        | 68.3 | 68.1 – 68.5 |          | 1.91                          | 1.89 – 1.93 |          |
| Women           | 54.5        | 72.0 | 71.9 – 72.2 |          | 1.94                          | 1.92 – 1.96 |          |
| Age group       |             |      |             | <0.001   |                               |             | 0.306    |
| Adults          | 78.5        | 69.7 | 69.5 – 69.8 |          | 1.93                          | 1.91 – 1.94 |          |
| Elderly         | 21.5        | 72.8 | 72.5 – 73.1 |          | 1.94                          | 1.92 – 1.97 |          |

\*t test. <sup>a</sup>Carbon footprint: greenhouse gas emissions (kg CO<sub>2</sub>eq/1000 kcal per day).
